# Supplementary figures and images for: S-ethyl ethanethiosulfinate, a derivative of allicin, induces metacaspase-dependent apoptosis through ROS generation in Penicillium chrysogenum
Source: Oxford University Press journal article supplement (doi:10.1042/bsr20190167), 2019-05-29

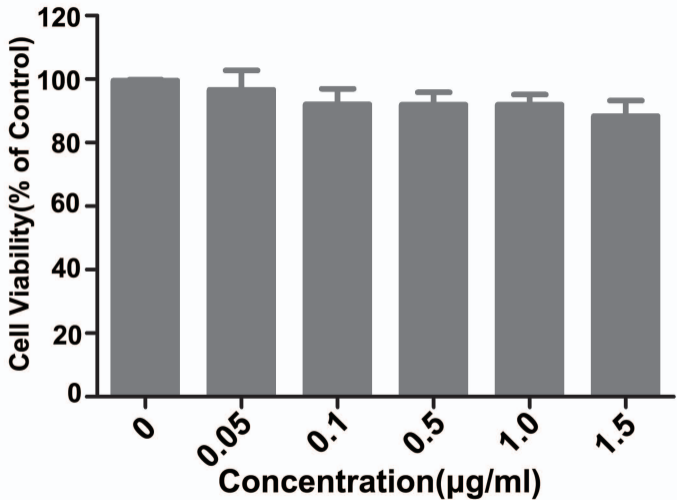

Supplement: bsr-2019-0167_supp.pdf [file bsr-2019-0167_supp.pdf]
